# Supplementary material
Source: MDPI journal article supplement (https://www.mdpi.com/2306-5710/8/2/30)
Supplement: s1 [file s1]

# WSU and Gold Rush Malt 2019 Experimental Variety Malting Trials

Batch Number: 123118  
 Weight lbs: 4500  
 Variety: Copeland

## Steeping

| Date       | Time  | Process   | H2O Set Temp °F | Grain Moisture % | Grain Bed Temp |
|------------|-------|-----------|-----------------|------------------|----------------|
| 12/31/2018 | 13:00 | Steep In  | 65              | N/A              | N/A            |
|            | 21:00 | Air Rest  | N/A             | N/A              | N/A            |
| 01/01/2019 | 09:00 | Steep     | 65              | 32.29            | 46.00          |
|            | 21:00 | Air Rest  | N/A             | NA               | 60.10          |
| 01/02/2019 | 11:30 | Steep     | 65              | 40.75            | 51.80          |
|            | 16:00 | Steep Out | N/A             | 42.78            | 61.50          |

## Germination

| Date       | Time  | Process    | Temp Set <sup>1</sup> | Humidity Set <sup>2</sup> | Grain Moisture % | Grain Bed Front Temp °F | Grain Bed Rear Temp °F | Grain Bed Avg. Temp °F |
|------------|-------|------------|-----------------------|---------------------------|------------------|-------------------------|------------------------|------------------------|
| 01/02/2019 | 17:20 | Begin Germ | 90/100                | 10/20                     | 42.78            | 65.10                   | 63.90                  | 64.50                  |
| 01/03/2019 | 06:40 | 2 Turns    | 95/105                | 10/20                     | N/A              | 60.60                   | 60.50                  | 60.55                  |
|            | 16:00 | 2 Turns    | 95/105                | 10/20                     | 43.41            | N/A                     | N/A                    | N/A                    |
| 01/04/2019 | 06:30 | 2 Turns    | 95/105                | 10/10                     | 42.15            | 65.00                   | 63.50                  | 64.25                  |
|            | 15:30 | 2 Turns    | 95/105                | 10/10                     | 42.10            | 65.90                   | 64.30                  | 65.10                  |
| 01/05/2019 | 07:00 | 2 Turns    | 93/103                | 10/10                     | 38.97            | 65.80                   | 64.00                  | 64.90                  |
|            | 16:00 | 2 Turns    | 93/103                | 20/10                     | 38.70            | 64.80                   | 64.00                  | 64.40                  |

# WSU and Gold Rush Malt 2019 Experimental Variety Malting Trials

## Kilning

| Date     | Time  | Kilning Stage | Temp Set °F | Blower Set Hz | Off Air Temp °F | Off Air RH % | Grain Bed Avg. Temp °F |
|----------|-------|---------------|-------------|---------------|-----------------|--------------|------------------------|
| 01/06/19 | 07:15 | 1 (Dry)       | 130         | 45            | N/A             | 100.0        | 65.35                  |
| 01/07/19 | 02:46 | 2 (Cure)      | 140         | 45            | 104.2           | 17.5         | 124.00                 |
|          | 04:22 | 3             | 160         | 45            | 116.0           | 9.9          | 134.00                 |
|          | 05:48 | 4             | 180         | 40            | 130.2           | 6.0          | 149.00                 |
|          | 09:12 | 5             | 200         | 35            | 161.0           | 1.0          | 169.00                 |
|          | 11:03 | End Cure      | Off         | Off           | 175.0           | 0.1          | 182.00                 |

**Final Moisture %:** 3.97  
**Friability %:** 83.3  
**Yield lbs.:** 3626.45  
**Malting Loss %:** 19.4

**Notes:** N/A: Data not available or applicable

<sup>1</sup> Temp Set is **Burner temp/Cooler temp** settings

<sup>2</sup> Humidity Set is **minutes on/minutes off** of misting system in incoming air

# WSU and Gold Rush Malt 2019 Experimental Variety Malting Trials

Batch Number: 10719  
 Weight lbs: 4106  
 Variety: 12WA-120.14

## Steeping

| Date       | Time  | Process   | H2O Set Temp °F | Grain Moisture % | Grain Bed Temp |
|------------|-------|-----------|-----------------|------------------|----------------|
| 01/07/2019 | 13:00 | Steep In  | 65              | N/A              | N/A            |
|            | 21:00 | Air Rest  | N/A             | N/A              | 63.20          |
| 01/08/2019 | 07:00 | Steep     | 65              | 31.6             | N/A            |
|            | 20:30 | Air Rest  | N/A             | NA               | 61.30          |
| 01/09/2019 | 07:00 | Steep     | 65              | 39.39            | 53.00          |
|            | 15:00 | Steep Out | N/A             | 42.58            | 62.00          |

## Germination

| Date       | Time  | Process    | Temp Set <sup>1</sup> | Humidity Set <sup>2</sup> | Grain Moisture % | Grain Bed Front Temp °F | Grain Bed Rear Temp °F | Grain Bed Avg. Temp °F |
|------------|-------|------------|-----------------------|---------------------------|------------------|-------------------------|------------------------|------------------------|
| 01/09/2019 | 17:00 | Begin Germ | 90/100                | 10/20                     | 42.58            | 65.00                   | 64.70                  | 64.85                  |
| 01/10/2019 | 06:30 | 2 Turns    | 85/95                 | 10/20                     | 44.53            | 67.10                   | 67.70                  | 67.40                  |
|            | 15:45 | 2 Turns    | 80/90                 | 20/10                     | 44.20            | 67.00                   | 67.70                  | 67.35                  |
| 01/11/2019 | 06:45 | 2 Turns    | 80/90                 | 20/10                     | 41.46            | N/A                     | N/A                    | N/A                    |
|            | 16:00 | 2 Turns    | 75/85                 | 20/10                     | 43.33            | 66.40                   | 63.60                  | 65.00                  |
| 01/12/2019 | 06:37 | 2 Turns    | 80/90                 | 20/10                     | 42.66            | N/A                     | N/A                    | N/A                    |
|            | 16:15 | 2 Turns    | 80/90                 | 20/5                      | 41.81            | 62.20                   | 60.60                  | 61.40                  |
| 01/13/2019 | 07:10 | 2 Turns    | 87/97                 | 20/5                      | 40.88            | 61.90                   | 60.90                  | 61.40                  |
|            | 16:16 | 2 Turns    | 85/95                 | 20/5                      | 41.19            | 66.70                   | 63.90                  | 65.30                  |
| 01/14/2019 | 06:45 | 2 Turns    | 70/80                 | 20/5                      | 41.10            | 69.20                   | 65.80                  | 67.50                  |

# WSU and Gold Rush Malt 2019 Experimental Variety Malting Trials

## Kilning

| Date     | Time  | Kilning Stage | Temp Set °F | Blower Set Hz | Off Air Temp °F | Off Air RH % | Grain Bed Avg. Temp °F |
|----------|-------|---------------|-------------|---------------|-----------------|--------------|------------------------|
| 01/14/19 | 16:30 | 1 (Dry)       | 130         | 45            | N/A             | 100.0        | 64.10                  |
| 01/15/19 | 12:04 | 2 (Cure)      | 140         | 45            | 105.2           | 17.6         | 121.00                 |
|          | 13:23 | 3             | 160         | 45            | 126.2           | 13.6         | 125.00                 |
|          | 15:28 | 4             | 180         | 40            | 130.2           | 5.9          | 147.00                 |
|          | 17:39 | 5             | 200         | 35            | 161.0           | 1.0          | 168.00                 |
|          | 11:03 | End Cure      | Off         | Off           | 175.0           | 0.1          | 183.00                 |

**Final Moisture %:** 3.6  
**Friability %:** N/A  
**Yield lbs.:** 3369.1  
**Malting Loss %:** 17.9

**Notes:** N/A: Data not available or applicable

<sup>1</sup> Temp Set is **Burner temp/Cooler temp** settings

<sup>2</sup> Humidity Set is **minutes on/minutes off** of misting system in incoming air

# WSU and Gold Rush Malt 2019 Experimental Variety Malting Trials

Batch Number: 11419  
 Weight lbs: 4036  
 Variety: 12WA-120.17

## Steeping

| Date       | Time  | Process   | H2O Set Temp °F | Grain Moisture % | Grain Bed Temp |
|------------|-------|-----------|-----------------|------------------|----------------|
| 01/14/2019 | 11:15 | Steep In  | 65              | N/A              | 63.50          |
|            | 19:15 | Air Rest  | N/A             | N/A              | 63.90          |
| 01/15/2019 | 08:00 | Steep     | 65              | 32.24            | 51.20          |
|            | 20:00 | Air Rest  | N/A             | NA               | 61.00          |
| 01/16/2019 | 07:00 | Steep     | 65              | 40.28            | 49.80          |
|            | 15:15 | Steep Out | N/A             | 42.63            | 62.80          |

## Germination

| Date       | Time  | Process    | Temp Set <sup>1</sup> | Humidity Set <sup>2</sup> | Grain Moisture % | Grain Bed Front Temp °F | Grain Bed Rear Temp °F | Grain Bed Avg. Temp °F |
|------------|-------|------------|-----------------------|---------------------------|------------------|-------------------------|------------------------|------------------------|
| 01/16/2019 | 16:35 | Begin Germ | 85/95                 | 10/20                     | 42.63            | 64.20                   | 64.60                  | 64.40                  |
| 01/17/2019 | 06:50 | 2 Turns    | 87/97                 | 10/10                     | 44.59            | 63.90                   | 64.00                  | 63.95                  |
|            | 15:30 | 2 Turns    | 82/92                 | 15/10                     | 43.20            | 64.70                   | 64.20                  | 64.45                  |
| 01/18/2019 | 07:20 | 2 Turns    | 70/80                 | 15/10                     | 43.38            | 71.40                   | 68.20                  | 69.80                  |
|            | 15:30 | 2 Turns    | 65/75                 | 20/10                     | 42.68            | 66.60                   | 67.30                  | 66.95                  |
| 01/19/2019 | 06:30 | 2 Turns    | 62/72                 | 20/5                      | 41.24            | 63.70                   | 61.90                  | 62.80                  |
|            | 15:45 | 2 Turns    | 60/70                 | 20/5                      | 40.73            | 65.90                   | 63.20                  | 64.55                  |
| 01/20/2019 | 07:20 | 2 Turns    | 60/70                 | 20/5                      | N/A              | 63.90                   | 62.40                  | 63.15                  |
|            | 13:51 | 2 Turns    | 65/75                 | 20/5                      | 42.70            | 63.20                   | 62.50                  | 62.85                  |
| 01/21/2019 | 07:00 | 2 Turns    | 65/75                 | 20/5                      | 42.70            | 63.20                   | 62.50                  | 62.85                  |
|            | 14:30 | 2 Turns    | 65/75                 | 20/5                      | 43.52            | 67.50                   | 64.60                  | 66.05                  |

# WSU and Gold Rush Malt 2019 Experimental Variety Malting Trials

## Kilning

| Date     | Time  | Kilning Stage | Temp Set °F | Blower Set Hz | Off Air Temp °F | Off Air RH % | Grain Bed Avg. Temp °F |
|----------|-------|---------------|-------------|---------------|-----------------|--------------|------------------------|
| 01/21/19 | 18:00 | 1 (Dry)       | 130         | 45            | N/A             | 100.0        | N/A                    |
| 01/22/19 | 14:36 | 2 (Cure)      | 140         | 45            | 105.5           | 17.6         | 122.00                 |
|          | 15:58 | 3             | 160         | 45            | 116.0           | 11.8         | 132.00                 |
|          | 17:56 | 4             | 180         | 40            | 130.2           | 5.7          | 142.00                 |
|          | 20:12 | 5             | 200         | 35            | 161.0           | 0.6          | 166.00                 |
|          | 21:59 | End Cure      | Off         | Off           | 175.0           | 0.1          | 180.00                 |

**Final Moisture %:** 4.28  
**Friability %:** N/A  
**Yield lbs.:** 3315.53  
**Malting Loss %:** 18

**Notes:** N/A: Data not available or applicable

<sup>1</sup> Temp Set is **Burner temp/Cooler temp** settings

<sup>2</sup> Humidity Set is **minutes on/minutes off** of misting system in incoming air

# WSU and Gold Rush Malt 2019 Experimental Variety Malting Trials

Batch Number: 1012119

Weight lbs: 4246

Variety: 10WA-117.17

## Steeping

| Date       | Time  | Process   | H2O Set Temp °F | Grain Moisture % | Grain Bed Temp |
|------------|-------|-----------|-----------------|------------------|----------------|
| 01/21/2019 | 10:30 | Steep In  | 65              | N/A              | N/A            |
|            | 18:30 | Air Rest  | N/A             | N/A              | N/A            |
| 01/22/2019 | 08:00 | Steep     | 65              | 33.79            | 52.50          |
|            | 20:00 | Air Rest  | N/A             | NA               | 63.50          |
| 01/23/2019 | 07:00 | Steep     | 65              | 41.15            | 62.70          |
|            | 15:00 | Steep Out | N/A             | 44.1             | N/A            |

## Germination

| Date       | Time  | Process    | Temp Set <sup>1</sup> | Humidity Set <sup>2</sup> | Grain Moisture % | Grain Bed Front Temp °F | Grain Bed Rear Temp °F | Grain Bed Avg. Temp °F |
|------------|-------|------------|-----------------------|---------------------------|------------------|-------------------------|------------------------|------------------------|
| 01/23/2019 | 16:40 | Begin Germ | 85/95                 | 10/20                     | 44.10            | 65.70                   | 66.40                  | 66.05                  |
| 01/24/2019 | 06:15 | 2 Turns    | 82/92                 | 10/20/19                  | 45.90            | 67.90                   | 68.50                  | 68.20                  |
|            | 15:50 | 2 Turns    | 70/80                 | 15/20                     | 44.09            | 67.10                   | 67.20                  | 67.15                  |
| 01/25/2019 | 06:30 | 2 Turns    | 85/95                 | 20/10                     | 43.29            | 54.70                   | 54.80                  | 54.75                  |
|            | 16:45 | 2 Turns    | 70/80                 | 20/10                     | 42.07            | 61.50                   | 55.60                  | 58.55                  |
| 01/26/2019 | 06:15 | 2 Turns    | 60/70                 | 20/5                      | 42.36            | 65.30                   | 64.30                  | 64.80                  |
|            | 16:20 | 2 Turns    | 60/70                 | 20/5                      | 41.09            | 65.00                   | 63.40                  | 64.20                  |
| 01/27/2019 | 07:14 | 2 Turns    | 60/70                 | 30/5                      | 41.11            | 64.30                   | 63.50                  | 63.90                  |
|            | 16:15 | 2 Turns    | 60/70                 | 30/5                      | 40.25            | 66.50                   | 63.80                  | 65.15                  |
| 01/28/2019 | 07:20 | 2 Turns    | 60/70                 | 30/5                      | 39.17            | 65.20                   | 62.10                  | 63.65                  |
|            | 14:48 | 2 Turns    | 65/75                 | Off                       | 38.66            | 64.60                   | 61.10                  | 62.85                  |

# WSU and Gold Rush Malt 2019 Experimental Variety Malting Trials

## Kilning

| Date     | Time  | Kilning Stage | Temp Set °F | Blower Set Hz | Off Air Temp °F | Off Air RH % | Grain Bed Avg. Temp °F |
|----------|-------|---------------|-------------|---------------|-----------------|--------------|------------------------|
| 01/28/19 | 18:06 | 1 (Dry)       | 130         | 45            | 58.8            | 100.0        | 51.00                  |
| 01/29/19 | 13:43 | 2 (Cure)      | 140         | 45            | 106.5           | 17.5         | 125.00                 |
|          | 14:43 | 3             | 160         | 45            | 125.4           | 13.5         | 128.00                 |
|          | 16:39 | 4             | 180         | 40            | 130.2           | 5.9          | 143.00                 |
|          | 18:58 | 5             | 200         | 35            | 161.0           | 0.4          | 166.00                 |
|          | 20:49 | End Cure      | Off         | Off           | 175.0           | 0.1          | 181.00                 |

**Final Moisture %:** 3.59  
**Friability %:** N/A  
**Yield lbs.:** 3459.68  
**Malting Loss %:** 18.5

**Notes:** N/A: Data not available or applicable

<sup>1</sup> Temp Set is **Burner temp/Cooler temp** settings

<sup>2</sup> Humidity Set is **minutes on/minutes off** of misting system in incoming air



### **Malting Remarks Made by Tom Hutchison (Owner, Gold Rush Malt) to Stephen Bramwell**

Really tough to get hydrated

Tough to control germination temp, take off on heat, then too cold

Not easiest varieties to work with.

Aaron Macleod (Hartwick Center for Craft Food and Beverage): he thinks variation in reps; due to protein levels in Rep 1.

At end germ, acospores full length slightly more, so stop germ, start kiln, but some halfway. Uneven germ. Because why? Hydration is high. Longest germination I've done, over 5 day.

Work with some more, hard to say, feeling a large Malthouse not happy with long germ time. Copeland not so much, should have left go another day. Under-modified, treated like other standard varieties. Germ 1 more day. Not best parameters. 12.5 protein, too high upper limit. Higher protein, harder to hydrate. Getting water into the kernel. Experienced that with Full Pint, hard to keep protein down on that variety. It's short, and N efficient [in the field/accumulates protein readily].

Very plump varieties, bucket that catches over top screen, 2x bucket, 3x bucket in one batch. Only 1x typically. Was on top screen on seed cleaner, clean malt at end. Only straw typically. Malting loss higher than normal, high moisture content starting point. As high as 12%; seemed a bit of thins, and rye. Lot of rye, in there. Last: 117.17 seemed to malt a little easier, not as plump a kernel. Plump can make it harder to hydrate.

Link between starting barley protein, carry through, see in Soluble (S/T) Ask Aaron about this.

If non-uniform protein, modification lead to higher beta glucan, lower friability.

Scaling up from small micro-maltster; doesn't scale particularly well (in Tom's opinion). Whole bunch more mass of grain to try control temperature on. Keep uniform. results don't scale as well as wish, he thought.
